# Supplementary material for: Resource Allocation Under Demand Uncertainty and Private Information
Source: Atypon-hosted journal article supplement (doi:10.1287/mnsc.2016.2574), 2016-11-03
Supplement: mnsc.2016.2574-sm.pdf [file mnsc.2016.2574-sm.pdf]

**Electronic Companion**

***Resource Allocation under Demand Uncertainty and Private Information***

Alexandre Belloni, Giuseppe Lopomo and Shouqiang Wang

**Appendix EC.1: Proofs in Section 3**

*Proof of Theorem 1 and Proposition 1.* We divide the proof in two steps: i) the main arguments, and ii) proof of Proposition 1 and finer properties of  $q^\circ$  used in i).

*Step 1. Main Arguments.* Consider the following relaxed *ex ante* problem

$$\min_{q,m} \mathbb{E}_{x,y} \left[ C_0 \left( x, \sum_{i=1}^M q_i(x,y) \right) + \sum_{i=1}^M m_i(x,y) \right] \quad \text{subject to } (\mathbf{IR}_i^P) \text{ and } 0 \leq q_i(x,y) \leq y_i, \quad i = 1, \dots, M.$$

It is obvious that all the constraints in  $(\mathbf{IR}_i^P)$  necessarily bind and hence we can impose them as equalities to eliminate the variable  $m$  from the above problem, rendering the objective function to

$$\mathbb{E}_{x,y} \left[ C_0 \left( x, \sum_{i=1}^M q_i(x,y) \right) + \sum_{i=1}^M C_i(y_i, q_i(x,y)) - \sum_{i=1}^M C_i(y_i, 0) \right],$$

which coincides with the objective function of the first-best problem (4) and is minimized by  $q^\circ$ .

In particular, setting  $m_i^\circ(x,y) = (c_i - h_i) q_i^\circ(x,y)$  implies that  $(\mathbf{IR}_i^P)$  holds with equality *ex post* for all  $i = 1, \dots, M$ .

Therefore, it remains to show that the policy  $\{q_i^\circ(x,y), m_i^\circ(x,y)\}_{i=1}^M$  also satisfies  $(\mathbf{IC}_i^P)$  *ex post*,  $(\mathbf{IC}_0^P)$  and  $(\mathbf{IR}_0^P)$ . For any  $x, y$ , we have

$$C_i(y_i, q_i^\circ(x,y)) - m_i^\circ(x,y) = C_i(y_i, 0) = h_i y_i, \quad \text{for } i = 1, \dots, M,$$

which implies that  $(\mathbf{IC}_i^P)$  holds with equality *ex post*. Moreover, by (4) we have

$$C_0 \left( x, \sum_{i=1}^M q_i^\circ(x,y) \right) + \sum_{i=1}^M C_i(y_i, q_i^\circ(x,y)) \leq C_0(x, 0) + \sum_{i=1}^M C_i(y_i, 0)$$

and by the previous equality

$$\begin{aligned} C_0 \left( x, \sum_{i=1}^M q_i^\circ(x,y) \right) + \sum_{i=1}^M m_i^\circ(x,y) &= C_0 \left( x, \sum_{i=1}^M q_i^\circ(x,y) \right) + \sum_{i=1}^M [C_i(y_i, q_i^\circ(x,y)) - C_i(y_i, 0)] \\ &\leq C_0(x, 0). \end{aligned}$$

The last inequality is  $(\mathbf{IR}_0^P)$ . Finally, to see that  $(\mathbf{IC}_0^P)$  also holds, for each  $x, x', y$ , define

$$\begin{aligned} \Delta(x, x', y) &:= C_0 \left( x, \sum_{i=1}^M q_i^\circ(x,y) \right) + \sum_{i=1}^M m_i^\circ(x,y) - \left[ C_0 \left( x, \sum_{i=1}^M q_i^\circ(x',y) \right) + \sum_{i=1}^M m_i^\circ(x',y) \right] \\ &= (h_0 + p_0) \int_{-x + \sum_{i=1}^N q_i^\circ(x',y)}^{-x + \sum_{i=1}^N q_i^\circ(x,y)} G_0(z) dz - \sum_{i=1}^M (p_0 + h_i - c_i) (q_i^\circ(x,y) - q_i^\circ(x',y)). \end{aligned}$$

We will show that  $\Delta(x, x', y) \leq 0$  hence  $(IC_0^P)$  holds by integrating  $y$  out.

Let  $\eta_i = G_0^{-1}((h_i + p_0 - c_i)/(h_0 + p_0))$  for  $i = 1, \dots, M$ . Note that  $\eta_i$  is decreasing in  $i = 1, \dots, M$  since  $c_i - h_i$  is increasing. The index  $i^\circ(x, y)$  is defined in Step 2 below.

If  $\eta_1 \leq -x < -x'$ , then  $q_i^\circ(x, y) = q_i^\circ(x', y) = 0$  by Step 2 (\*\*\*) and hence  $\Delta(x, x', y) = 0$ .

If  $-x < -x'$  and  $-x \leq \eta_i \leq -x + \sum_{j=1}^M y_j$  for some  $i = 1, \dots, M$ , then by Step 2 (\*\*),

$$G_0 \left( -x + \sum_{j=1}^M q_j^\circ(x, y) \right) = \frac{p_0 + h_{i^\circ(x, y)} - c_{i^\circ(x, y)}}{h_0 + p_0}.$$

Furthermore, we have  $q_i^\circ(x, y) \geq q_i^\circ(x', y)$  by Step 2 (\*). Hence,

$$\begin{aligned} \Delta(x, x', y) &\leq \sum_{i=1}^{i^\circ(x, y)} \left[ (h_0 + p_0) G_0 \left( -x + \sum_{i=1}^N q_i^\circ(x, y) \right) - (p_0 + h_i - c_i) \right] (q_i^\circ(x, y) - q_i^\circ(x', y)) \\ &= \sum_{i=1}^{i^\circ(x, y)} \underbrace{[(h_{i^\circ(x, y)} - c_{i^\circ(x, y)}) - (h_i - c_i)]}_{\leq 0} \underbrace{(q_i^\circ(x, y) - q_i^\circ(x', y))}_{\geq 0} \leq 0. \end{aligned}$$

If  $-x < -x'$  and  $\eta_M \geq -x + \sum_{i=1}^M y_i$ , then by Step 2 (\*\*\*),

$$G_0 \left( -x + \sum_{j=1}^M q_j^\circ(x, y) \right) \leq \frac{p_0 + h_M - c_M}{h_0 + p_0}.$$

Furthermore, we have  $q_i^\circ(x, y) \geq q_i^\circ(x', y)$  by Step 2 (\*). Hence,

$$\begin{aligned} \Delta(x, x', y) &\leq \sum_{i=1}^M \left[ (h_0 + p_0) G_0 \left( -x + \sum_{i=1}^N x_i \right) - (p_0 + h_i - c_i) \right] (q_i^\circ(x, y) - q_i^\circ(x', y)) \\ &\leq \sum_{i=1}^M \underbrace{[(h_M - c_M) - (h_i - c_i)]}_{\leq 0} \underbrace{(q_i^\circ(x, y) - q_i^\circ(x', y))}_{\geq 0} \leq 0. \end{aligned}$$

If  $-x > -x' \geq \eta_1$ , then  $q_i^\circ(x, y) = q_i^\circ(x', y) = 0$  by Step 2 (\*\*\*) and hence  $\Delta(x, x', y) = 0$ .

If  $-x > \eta_1 \geq -x'$ , we have  $0 = i^\circ(x, y) < i^\circ(x', y)$  and  $0 = q_i^\circ(x, y) \leq q_i^\circ(x', y)$  for all  $i = 1, \dots, M$  by Step 2 (\*\*\*)

$$\begin{aligned} \Delta(x, x', y) &\leq \sum_{i=1}^{i^\circ(x', y)} [(h_0 + p_0) G_0(-x) - (p_0 + h_i - c_i)] (q_i^\circ(x, y) - q_i^\circ(x', y)) \\ &\leq \sum_{i=i^\circ(x, y)}^{i^\circ(x', y)} \underbrace{[(h_1 - c_1) - (h_i - c_i)]}_{\geq 0} \underbrace{(q_i^\circ(x, y) - q_i^\circ(x', y))}_{\leq 0} \leq 0. \end{aligned}$$

If  $-x > -x'$ , which implies  $i^\circ(x, y) \leq i^\circ(x', y)$  and  $q_i^\circ(x, y) \leq q_i^\circ(x', y)$  by Step 2 (\*), and  $-x \leq \eta_i \leq -x + \sum_{i=1}^M y_i$  for some  $i = 1, \dots, M$ , which implies, by Step 2 (\*\*),

$$G_0 \left( -x + \sum_{j=1}^M q_j^\circ(x, y) \right) = \frac{p_0 + h_{i^\circ(x, y)} - c_{i^\circ(x, y)}}{h_0 + p_0},$$

then we have

$$\begin{aligned} \Delta(x, x', y) &\leq \sum_{i=i^\circ(x, y)}^{i^\circ(x', y)} \left[ (h_0 + p_0)G_0 \left( -x + \sum_{i=1}^N q_i^\circ(x, y) \right) - (p_0 + h_i - c_i) \right] (q_i^\circ(x, y) - q_i^\circ(x', y)) \\ &= \sum_{i=i^\circ(x, y)}^{i^\circ(x', y)} \underbrace{[(h_{i^\circ(x, y)} - c_{i^\circ(x, y)}) - (h_i - c_i)]}_{\geq 0} \underbrace{(q_i^\circ(x, y) - q_i^\circ(x', y))}_{\leq 0} \leq 0. \end{aligned}$$

If  $-x > -x'$  but  $\eta_M \geq -x + \sum_{i=1}^M y_i$ , we have  $q_i^\circ(x, y) = q_i^\circ(x', y) = y_i$  for all  $i = 1, \dots, M$ . Hence,  $\Delta(x, x', y) = 0$ .

*Step 2. Proof of Proposition 1 and properties of the allocation  $q^\circ$ .*

Recall the definition of  $\eta_i = G_0^{-1}((h_i + p_0 - c_i)/(h_0 + p_0))$  for  $i = 1, \dots, M$ . Note that  $\eta_i$  is decreasing in  $i = 1, \dots, M$  since  $c_i - h_i$  is increasing. Because of the convexity of the objective function in (4), KKT condition is necessary and sufficient for global optimality of  $q^\circ$ , namely there exists  $\nu_i, \lambda_i \geq 0$ ,  $i = 1, \dots, M$  such that the following (in)equalities are satisfied for  $i = 1, \dots, M$ :

$$\begin{aligned} (h_0 + p_0)G_0 \left( -x + \sum_{j=1}^M q_j \right) - p_0 + c_i - h_i + \nu_i - \lambda_i &= 0 \\ 0 \leq q_i \leq y_i, \quad \nu_i(y_i - q_i) = 0, \quad \lambda_i q_i &= 0 \end{aligned} \tag{EC.1}$$

Hence, for given  $y$ , we consider the following greedy algorithm:

Set  $i = 0$  and  $q^\circ = 0$ . If  $-x \geq \eta_1$ , **terminate**.

**Iteration Step:** if  $i \geq M$  **terminate**;

$i \leftarrow i + 1$ ;

if  $-x + \sum_{j=1}^i y_j < \eta_i$ , set  $q_i^\circ = y_i$  and return to **Iteration Step**;

else set  $q_i^\circ = \eta_i + x - \sum_{j=1}^{i-1} y_j$  and **terminate**.

Let  $i^\circ$  denote the exiting index  $i$  and note that  $q_i^\circ = 0$  for all  $i > i^\circ$ . Hence  $q_i^\circ(x, y)$ ,  $i = 1, \dots, M$ , is the one given in (6). Moreover, define

$$\nu_i = \begin{cases} (c_{i^\circ} - h_{i^\circ}) - (c_i - h_i), & \text{if } i < i^\circ, \\ 0, & \text{if } i \geq i^\circ, \end{cases} \text{ and } \lambda_i = \begin{cases} 0, & \text{if } i \leq i^\circ, \\ (c_i - h_i) - (c_{i^\circ} - h_{i^\circ}), & \text{if } i > i^\circ. \end{cases}$$

Then  $\nu_i, \lambda_i \geq 0$  for all  $i$ , together with  $q_i^\circ(x, y)$ ,  $i = 1, \dots, M$  satisfy (EC.1). Therefore,  $q_i^\circ(x, y)$ ,  $i = 1, \dots, M$ , indeed solves (4).

It follows that:

(\*)  $i^\circ = i^\circ(x, y)$  and  $q_i^\circ(x, y)$  is nondecreasing in  $x$  for  $i = 1, 2, \dots, M$ ;

(\*\*)  $-x + \sum_{j=1}^M q_j^\circ(x, y) = \eta_{i^\circ}$  if  $-x \leq \eta_i \leq -x + \sum_{i=1}^M y_i$  for some  $i = 1, \dots, M$ ;

(\*\*\*)  $q_i^\circ(x, y) = 0$  for  $i = 1, \dots, M$  if  $-x \geq \eta_1$  (and hence  $-x \geq \eta_i$  for all  $i = 1, \dots, M$ ).

(\*\*\*\*)  $q_i^\circ(x, y) = y_i$  for  $i = 1, \dots, M$  if  $\eta_M \geq -x + \sum_{i=1}^M y_i$  (and hence  $\eta_i \geq -x + \sum_{i=1}^M y_i$  for all  $i = 1, \dots, M$ ).  $\square$

## Appendix EC.2: Characterization of $(\text{IC}_i^D)$ and $(\text{IR}_i^D)$

Most of the derivation of this section will be based on the following straightforward calculation:

$$C_i(x_i, q_i) = (h_i + p_i) \int_{\underline{d}_i}^{q_i - x_i} G_i(z) dz + p_i(x_i - q_i), \quad i = 1, \dots, N, \quad (\text{EC.1})$$

where we recall that  $\underline{d}_i$  is the lower bound of the support of  $D_i$ . Therefore, it is straightforward to see that

$$C_i(x_i, 0) = p_i x_i, \quad i = 1, \dots, N. \quad (\text{EC.2})$$

In this section, we drop the dependence on  $y$  and abbreviate  $m(x, y)$  as  $m(x)$ ,  $q(x, y)$  as  $q(x)$ .

*Proof of Lemma 1.* For any  $q$  and  $m$ , define

$$\widehat{W}_i(x_i, x'_i) := \mathbb{E}_{x_{-i}} [C_i(x_i, q_i(x'_i, x_{-i})) + m_i(x'_i, x_{-i})], \quad i = 1, \dots, N.$$

Then  $(\text{IC}_i^D)$  can be formulated as

$$W_i(x) = \min_{x'_i \in [\underline{x}_i, \bar{x}_i]} \widehat{W}_i(x_i, x'_i).$$

We have

$$\frac{\partial}{\partial x_i} \widehat{W}_i(x_i, x'_i) = \mathbb{E}_{x_{-i}} \left[ \frac{\partial}{\partial x_i} C_i(x_i, q_i(x'_i, x_{-i})) \right] = \mathbb{E}_{x_{-i}} [-(h_i + p_i) G_i(q_i(x'_i, x_{-i}) - x_i) + p_i],$$

because the differentiation and expectation operators commute (Rosenthal 2000, Proposition 9.2.1).

Thus  $\left| \frac{\partial}{\partial x_i} \widehat{W}_i(x_i, x'_i) \right| \leq \max\{h_i, p_i\}$  for any  $(x_i, x'_i)$ , and (A1) follows from the *envelope theorem* of Milgrom and Segal (2002). The equality in (A2) follows from the definition of  $W_i(\cdot)$ .

By (EC.2), we have

$$W_i(x_i) - C_i(x_i, 0) = W_i(\underline{x}_i) - C_i(\underline{x}_i, 0) - (h_i + p_i) \mathbb{E}_{x_{-i}} \left[ \int_{\underline{x}_i}^{x_i} G_i(q_i(z, x_{-i}) - z) dz \right] \leq W_i(\bar{x}_i) - C_i(\bar{x}_i, 0).$$

Thus it suffices to impose only  $W_i(\underline{x}_i) \leq C_i(\underline{x}_i, 0)$  to obtain the  $(\text{IR}_i^D)$  constraint,  $W_i(x) - C_i(x_i, 0) \leq 0$  for all  $x_i$ .  $\square$

*Proof of Lemma 2.* Notice that

$$C_i(x_i, q_i) - C_i(x'_i, q_i) = -(h_i + p_i) \int_{x'_i}^{x_i} G_i(q_i - z) dz + p_i(x_i - x'_i).$$

Combining this equation and (EC.2), we have

$$\begin{aligned} & [C_i(x_i, q_i(x'_i, x_{-i})) + m_i(x'_i, x_{-i})] - [C_i(x_i, q_i(x)) + m_i(x)] \\ &= [C_i(x_i, q_i(x'_i, x_{-i})) - C_i(x'_i, q_i(x'_i, x_{-i}))] + [C_i(x'_i, q_i(x'_i, x_{-i})) + m_i(x'_i, x_{-i})] - [C_i(x_i, q_i(x)) + m_i(x)] \\ &= [C_i(x_i, q_i(x'_i, x_{-i})) - C_i(x'_i, q_i(x'_i, x_{-i}))] + [C_i(x'_i, 0) - C_i(x_i, 0)] - (h_i + p_i) \int_{x'_i}^{x_i} G_i(q_i(z, x_{-i}) - z) dz \end{aligned}$$

$$=(h_i + p_i) \int_{x'_i}^{x_i} [G_i(q_i(x'_i, x_{-i}) - z) - G_i(q_i(z, x_{-i}) - z)] dz \geq 0,$$

where the last inequality is due to the fact that if  $x'_i > (<)x_i$ ,  $q_i(x'_i, x_{-i}) \geq (\leq)q_i(z, x_{-i})$  for all  $z \in [x_i, x'_i]$  ( $z \in [x'_i, x_i]$ ) because of monotonicity of  $q_i(x)$  in  $x_i$  for any given  $x_{-i}$ . This shows (A3) and taking the expectation of (A3) with respect to  $x_{-i}$  yields (IC<sub>i</sub><sup>P</sup>).  $\square$

*Proof of Lemma 3.* Replace the term  $C_0(y, q(x))$  and  $\{\mathbb{E}_{x_{-i}}[m_i(x)]\}_{i=1}^N$  in (9) with the expression in (7) and (A2), respectively. In light of Lemma 1 and Lemma 2, we can focus on the following relaxed minimization problem:

$$\begin{aligned} \min_{\substack{q_i(\cdot), \dots, q_N(\cdot) \\ W_1(\underline{x}_1), \dots, W_N(\underline{x}_N)}} \mathbb{E}_x \left[ \sum_{i=1}^N (c_i - h_0) q_i(x) \right] &+ \sum_{i=1}^N \mathbb{E}_x [C_i(x_i, q_i(x))] \\ &+ \sum_{i=1}^N (h_i + p_i) \mathbb{E}_x \left[ \int_{\underline{x}_i}^{x_i} G_i(q_i(z, x_{-i}) - z) dz \right] - \sum_{i=1}^N W_i(\underline{x}_i) \end{aligned} \quad (\text{EC.3})$$

subject to  $\sum_{i=1}^N q_i(x) \leq y$ ,  $q_i(x) \geq 0$ , and  $W_i(\underline{x}_i) \leq C_i(\underline{x}_i, 0)$  for all  $x \in \mathcal{X}, i = 1, \dots, N$ .

Since the objective function is decreasing in  $W_i(\underline{x}_i)$  for  $i = 1, \dots, N$ , it is optimal to set,

$$W_i^*(\underline{x}_i) = C_i(\underline{x}_i, 0), \quad i = 1, \dots, N.$$

Furthermore, we have,

$$\begin{aligned} \mathbb{E}_x \left[ \int_{\underline{x}_i}^{x_i} G_i(q_i(z, x_{-i}) - z) dz \right] &= \mathbb{E}_{x_{-i}} \left[ \mathbb{E}_{x_i} \left[ \int_{\underline{x}_i}^{x_i} G_i(q_i(z, x_{-i}) - z) dz \right] \right] \\ &= \mathbb{E}_{x_{-i}} \left[ \mathbb{E}_{x_i} \left[ \frac{1 - F_i(x_i)}{f_i(x_i)} G_i(q_i(x) - x_i) \right] \right] \\ &= \mathbb{E}_x \left[ \frac{1 - F_i(x_i)}{f_i(x_i)} G_i(q_i(x) - x_i) \right], \quad i = 1, \dots, N \end{aligned}$$

where the second equality follows from integration by parts. Substituting the last expression into (EC.3) yields (A4). The second part of the result follows from Lemma 2.  $\square$

*Proof of Lemma 4.* The required monotonicity constraint is satisfied by  $q^*$  according to Lemma EC.4. Then the result immediately follows from Lemma 3.  $\square$

### Appendix EC.3: Quasi-convexity and Monotonicity of (10)

Lemma EC.1 below will be applied through out the paper with  $\alpha = (h_0 + p_i - c_i)/(h_i + p_i)$ ,  $G = G_i$ ,  $\underline{d} = \underline{d}_i$ ,  $\bar{d} = \bar{d}_i$ ,  $g = g_i$ ,  $\zeta = \frac{1 - F_i(x_i)}{f_i(x_i)} \geq 0$  for some  $i$ .

LEMMA EC.1. *Let  $G$  be a probability distribution supported on  $[\underline{d}, \bar{d}]$  with a upper-semi continuous probability density function  $g$  such that  $1 - G$  is log-concave,  $\zeta \geq 0$ , and  $\alpha \in (0, 1)$ . Define  $z^* := \inf\{z \in [\underline{d}, \bar{d}] \mid -\alpha + G(z) + \zeta g(z) \geq 0\}$ . Then*

- (i)  $-\alpha + G(z) + \zeta g(z)$  is nondecreasing for  $z \leq z^*$ ;  
(ii)  $-\alpha + G(z) + \zeta g(z) \geq 0$ , for all  $z \geq z^*$ .

*Proof.* It is equivalent to show that  $1 - G(z) - \zeta g(z)$  is non-increasing in  $z \leq z^*$  and for  $z \geq z^*$ ,

$$1 - G(z) - \zeta g(z) \leq 1 - \alpha. \quad (\text{EC.1})$$

By definition of  $z^*$ , if  $1 - G(z) - \zeta g(z) \leq 0$ , we must have  $z \geq z^*$  and (EC.1) holds for this case. Otherwise note that

$$\log(1 - G(z) - \zeta g(z)) = \log(1 - G(z)) + \log\left(1 - \zeta \frac{g(z)}{1 - G(z)}\right).$$

By the monotonicity of  $G$  we have  $\log(1 - G(z))$  is non-increasing, and by log-concavity of  $1 - G$  we have that  $-g(z)/[1 - G(z)]$  is non-increasing in  $z$ . Therefore both terms are non-increasing in  $z$ , establishing (i) and (ii) since  $1 - G(z^*) - \zeta g(z^*) \leq 1 - \alpha$ .  $\square$

Lemma EC.2 below will typically be applied to  $\alpha_i = (h_0 + p_i - c_i)/(h_i + p_i)$ ,  $a = 1$ , and  $\zeta_i(x_i) = \frac{1 - F_i(x_i)}{f_i(x_i)}$  as a non-increasing function of  $x_i$  for fixed  $x_{-i}$ .

LEMMA EC.2. *Assume that  $\zeta_i(x_i)$  is non-increasing (nondecreasing) in  $x_i$ , and let  $\alpha_i \in (0, 1)$ ,  $a > 0$ , and  $G_i$  be a probability distribution with density function  $g_i$ . Then  $z_i^*(x_i) := \inf\{z \in [\underline{d}, \bar{d}] : -\alpha_i + G_i(z) + a\zeta_i(x_i)g_i(z) \geq 0\}$  is nondecreasing (non-increasing) in  $x_i$ .*

*Proof.* Pick  $x_i < x'_i$  so that  $\zeta_i(x_i) \leq \zeta_i(x'_i)$ . For any  $z$

$$0 \leq -\alpha_i + G_i(z) + a\zeta_i(x_i)g_i(z) \leq -\alpha_i + G_i(z) + a\zeta_i(x'_i)g_i(z)$$

so that any  $z$  considered in the infimum problem for  $z_i^*(x_i)$  is also considered in the infimum problem for  $z_i^*(x'_i)$ . Thus,  $z_i^*(x_i) \geq z_i^*(x'_i)$ . Similar arguments apply when  $\zeta_i(x_i)$  is non-increasing in  $x_i$ .  $\square$

In what follows we need the definition

$$\mu_i(z|x_i) := (h_i + p_i)\tilde{G}_i(z|x_i) - (h_0 + p_i - c_i), \quad i = 1, \dots, N. \quad (\text{EC.2})$$

LEMMA EC.3. *Under Assumptions 1 and 2, the solution  $q^*(\cdot)$  to (10) can be characterized as follows: there is an index  $n^* = n^*(x, y)$  and a Lagrange multiplier  $L^* = L^*(x, y) \in [c_{n^*} - p_{n^*} - h_0, 0]$  and such that*

1.  $\mu_i(q_i^*(x, y) - x_i|x_i) = L^*$  for  $i \leq n^*$ , for which  $q_i^*(x, y) > 0$ .
2.  $c_j - p_j - h_0 \geq L^*$  for  $j > n^*$ , for which  $q_j^*(x, y) = 0$ .
3.  $\sum_{i=1}^N q_i^*(x, y) \leq y$  and  $L^* \cdot \left(\sum_{i=1}^N q_i^*(x, y) - y\right) = 0$ .

*Proof.* Let

$$V_i(z|x_i) := (c_i - P_i - h_0)z + (h_i + p_i) \left[ \int_{\underline{d}_i}^z G_i(u)du + \frac{1 - F_i(x_i)}{f_i(x_i)} G_i(z) \right]. \quad (\text{EC.3})$$

Then, the objective function in problem (10) can be written as  $\sum_{i=1}^N V_i(q_i - x_i|x_i)$  plus some constant independent of  $q$ . Straightforward computation reveals that  $\frac{d}{dz} V_i(z|x_i) = \mu_i(z|x_i)$  defined in (EC.2) and  $\frac{d}{dz} V_i(0|x_i) = c_i - p_i - h_0 < 0$  for all  $i$ . Therefore, there must be some  $q_i^*(x, y) > 0$ . In addition, Lemma EC.1 establishes that  $V_i(\cdot|x_i)$  is quasi-convex over the whole line, reaches its minimum at  $z_i^*(x_i) := \inf\{z \in [\underline{d}, \bar{d}] : -\frac{h_0+p_i-c_i}{h_i+p_i} + G_i(z) + \frac{1-F_i(x_i)}{f_i(x_i)} g_i(z) \geq 0\}$  and is convex over  $[-\infty, z_i^*(x_i)]$ . Thus, KKT conditions are necessary and sufficient to characterize the solution. Let  $L^* = L^*(x, y)$  be the Lagrange multiplier for the capacity constraint  $\sum_{i=1}^N q_i \leq y$ . Thus we have  $\mu_i(q_i^*(x, y) - x_i|x_i) = L^*$  for those  $i$  such that  $q_i^*(x, y) > 0$  and  $c_j - p_j - h_0 \geq L^*$  for those  $j$  such that  $q_j^*(x, y) = 0$ .

Let  $i$  be such that  $q_i^*(x, y) > 0$ . Then,  $L^* = \mu_i(q_i^*(x, y) - x_i|x_i) \geq c_i - p_i - h_0$  and  $L^* = \mu_i(q_i^*(x, y) - x_i|x_i) \leq 0$  because  $q_i^*(x, y) - x_i \leq z_i^*(x_i)$ , over which  $\mu_i(\cdot|x_i) \leq 0$  by quasi-convexity (Lemma EC.1). The complementarity condition follows from the fact that if  $\sum_{i=1}^N q_i^*(x, y) < y$ , then we must have  $q_i^*(x, y) - x_i \geq z_i^*(x_i)$  and  $L^* = \mu_i(z_i^*(x_i)|x_i) = 0$  by definition. Finally, since  $c_i - p_i - h_0$  is in an ascending order, we just need to let  $n^* = \max\{i \geq 0 : q_i^*(x, y) > 0\}$ .  $\square$

LEMMA EC.4. *Under Assumptions 1 and 2, there exists a solution  $q^*$  to (10) such that, for  $i = 1, \dots, N$ ,  $q_i^*(x, y)$  is nondecreasing in  $x_i$  and non-increasing in  $x_j$  for any  $j \neq i$ .*

*Proof.* For fixed  $x_{-i}$  and  $x_i > x'_i$ , consider  $q = q^*((x_i, x_{-i}), y)$  and  $q' = q^*((x'_i, x_{-i}), y)$ . We can assume  $q'_i > 0$ ; otherwise we are done.

We first claim that we can assume  $q_i > 0$ . Suppose the opposite, then we must have  $i > 1$  because  $q'_1 > 0$  and  $q_1 > 0$  for sure. Now,  $q_i = 0$  implies that  $q_j = 0$  for all  $j \geq i$ . Therefore, we must have  $q_k > q'_k > 0$  for some  $k < i$ . By Lemma EC.3 and the monotonicity of  $\mu_k(\cdot|x_k)$  in the relevant region,

$$c_i - p_i - k \leq \mu_i(q'_i - x'_i|x'_i) = \mu_k(q'_k - x_k|x_k) \leq \mu_k(q_k - x_k|x_k) = L,$$

where  $L$  is the Lagrange multiplier characterized in Lemma EC.3. Again, by Lemma EC.3,  $q_i = 0$  also implies  $c_i - p_i - k \geq L$ . Thus, the only possibility is that  $L = c_i - p_i - h_0 = c_j - p_j - h_0$  for all  $j \leq i$ , under which situation it is obvious how to construct an optimal solution satisfying the monotonicity conditions in the lemma. Therefore, let us assume  $q_i > 0$ .

By Lemma EC.3,  $q$  and  $q'$  are characterized by the existence of multipliers  $L$  and  $L'$ , and integers  $n$  and  $n'$  such that

$$\begin{aligned} j \leq n, j \neq i, \mu_j(q_j - x_j|x_j) = L, q_j > 0 & \quad j \leq n', j \neq i, \mu_j(q'_j - x_j|x_j) = L', q'_j > 0 \\ \mu_i(q_i - x_i|x_i) = L & \quad \mu_i(q'_i - x'_i|x'_i) = L' \\ j > n, j \neq i, c_j - p_j - h_0 \geq L, q_j = 0 & \quad j > n', j \neq i, c_j - p_j - h_0 \geq L', q'_j = 0 \\ L \cdot \left( \sum_{j=1}^N q_j - y \right) = 0 & \quad L' \cdot \left( \sum_{j=1}^N q'_j - y \right) = 0. \end{aligned}$$

Since  $\mu_i(z|x_i) \leq \mu_i(z|x'_i)$  for all  $z$  under Assumptions 1 and 2, it follows that  $0 \geq L' \geq L$ . Moreover, note that  $q_j - x_j \leq z_j^*(x_j)$  if  $j \leq n$  and  $q'_j - x_j \leq z_j^*(x_j)$  if  $j \leq n'$ . Therefore, since  $\mu_j(\cdot|x_j)$  is nondecreasing for  $z \leq z_j^*(x_j)$  by Lemma EC.1 (i), it follows that  $q'_j \geq q_j$  for  $j \leq \max\{n, n'\}$ ,  $j \neq i$ .

Thus, note that if  $L < 0$  the conditions above imply  $\sum_{i=1}^N q_i = y$  and we have

$$q'_i \leq y - \sum_{j \neq i} q'_j \leq y - \sum_{j \neq i} q_j = q_i$$

and the result follows. On the other hand, if  $L = 0$ , we also have  $L' = 0$  and  $q'_i = \max\{0, z_i^*(x'_i) + x'_i\} \leq \max\{0, z_i^*(x_i) + x_i\} = q_i$  since  $z_i^*(x_i) + x_i$  is nondecreasing in  $x_i$  by Lemma EC.2.  $\square$

### Appendix EC.4: Data Source for Calibrated Numerical Study in Section 5.1

This appendix contains Table EC.1 and Figure EC.1.

**Table EC.1 Calibration of the principal's cost parameter  $h_0$ .**

| Company                                                      | Sanofi Pasteur                   | Novartis                            | GSK                           |
|--------------------------------------------------------------|----------------------------------|-------------------------------------|-------------------------------|
| Facility Location                                            | Swiftwater, PA, USA <sup>b</sup> | Holly Springs, NC, USA <sup>c</sup> | Dresden, Germany <sup>e</sup> |
| Capacity (mil. doses)                                        | 100                              | 150                                 | 35 <sup>f</sup>               |
| Facility Value (\$ mil.) <sup>a</sup>                        | 150                              | 1,000                               | 160                           |
| 2013 Asset Value of Property, Plant & Equipment (\$ mil.)    | 13,004                           | 18,197                              | 13341                         |
| 2013 Annual Selling & General Expense (\$ mil.)              | 10,986                           | 17,609                              | 12752                         |
| Unit Cost of Unused Capacity (\$/Unit Capacity) <sup>b</sup> | 1.27                             | 6.45 <sup>d</sup>                   | 3.98                          |

<sup>a</sup> All the currency is converted to U.S. dollars using average exchange rates of year 2013 published by IRS (<http://www.irs.gov/Individuals/International-Taxpayers/Yearly-Average-Currency-Exchange-Rates>, accessed on July 5, 2015).

<sup>b</sup> Unit Cost of Unused Capacity =  $\frac{\text{Facility Value}}{\text{Value of Property, Plan \& Equipment}} \times \frac{\text{Annual Selling \& General Expense}}{\text{Capacity}}$ .

<sup>c</sup> The facility information is extracted from Sanofi Pasteur's press release ([http://en.sanofi.com/Images/13949\\_20090525\\_h1n1\\_en.pdf](http://en.sanofi.com/Images/13949_20090525_h1n1_en.pdf), accessed on July 5, 2015).

<sup>d</sup> The facility information is extracted from news report on <http://www.cidrap.umn.edu/news-perspective/2014/10/csl-novartis-deal-includes-us-cell-based-flu-vaccine-plant>, accessed on July 5, 2015.

<sup>e</sup> Novartis reported an operating loss in 2013 for their vaccines segment.

<sup>f</sup> The facility information is extracted from news report on <http://www.pharmaceutical-technology.com/projects/gsk-biologicals/>, accessed on July 5, 2015.

<sup>g</sup> The €125 million investment expanded the Dresden plant's plant capacity from 35 to 70 million doses.

| Vaccine                                         | Brandname/ Tradename                            | NDC               | Packaging                   | CDC Cost/<br>Dose | Private Sector Cost/<br>Dose | Contract End<br>Date | Manufacturer           | Contract<br>Number |
|-------------------------------------------------|-------------------------------------------------|-------------------|-----------------------------|-------------------|------------------------------|----------------------|------------------------|--------------------|
| Influenza [5, 6]<br>(Age 6 months and<br>older) | Fluzone®                                        | 49281-<br>0392-15 | 10 dose vial                | \$8.153           | \$10.69                      | 2/21/2014            | Sanofi Pasteur         | 200-2013-<br>54009 |
| Influenza [5]<br>(Age 18 - 64 years)            | Fluzone®                                        | 49281-<br>0707-55 | 10 pack - 1 dose<br>syringe | \$12.644          | \$16.72                      | 2/21/2014            | Sanofi Pasteur         | 200-2013-<br>54009 |
| Influenza [5]<br>(Age 36 months and<br>older)   | Fluzone®<br>No Preservative                     | 49281-<br>0013-50 | 10 pack - 1 dose<br>syringe | \$9.494           | \$12.49                      | 2/21/2014            | Sanofi Pasteur         | 200-2013-<br>54009 |
|                                                 |                                                 | 49281-<br>0013-10 | 10 pack - 1 dose<br>vial    | \$9.93            | \$13.075                     |                      |                        |                    |
| Influenza [5]<br>(Age 18 years and<br>older)    | Flucelvax® Preservative Free<br>Antibiotic free | 63851-<br>0612-01 | 10 pack - 1 dose<br>syringe | \$9.50            | \$18.25                      | 2/21/2014            | Novartis               | 200-2013-<br>54011 |
| Influenza [5, 6]<br>(Age 4 years and<br>older)  | Fluvirin®                                       | 66521-<br>0116-10 | 10 dose vial                | \$6.75            | \$13.25                      | 2/21/2014            | Novartis               | 200-2013-<br>54011 |
| Influenza [5]<br>(Age 4 years and<br>older)     | Fluvirin®<br>Preservative Free                  | 66521-<br>0116-02 | 10 pack - 1 dose<br>syringe | \$7.75            | \$14.35                      | 2/21/2014            | Novartis               | 200-2013-<br>54011 |
| Influenza [5, 6]<br>(Age 18 years and<br>older) | FluLaval®                                       | 19515-<br>0890-07 | 10 dose vial                | \$5.89            | \$9.50                       | 2/21/2014            | GlaxoSmithKline        | 200-2013-<br>54008 |
| Influenza [5]<br>(Age 36 months and<br>older)   | Fluarix®<br>Preservative Free                   | 58160-<br>0880-52 | 10 pack - 1 dose<br>syringe | \$8.08            | \$10.98                      | 2/21/2014            | GlaxoSmithKline        | 200-2013-<br>54008 |
|                                                 | Fluarix® Quadrivalent<br>Preservative Free      | 58160-<br>0900-52 | 10 pack - 1 dose<br>syringe | 12.03             | 15.90                        | 2/21/2014            | GlaxoSmithKline        | 200-2013-<br>54008 |
| Influenza [5]<br>(Age 9 years and<br>older)     | Afluria®<br>No Preservative                     | 33332-<br>0013-01 | 10 pack-1 dose<br>syringe   | \$8.13            | \$11.00                      | 2/21/2014            | Merck<br>(CSL product) | 200-2013-<br>54010 |
| Influenza [5, 6]<br>(Age 9 years and<br>older)  | Afluria®                                        | 33332-<br>0113-10 | 10 dose vials-1<br>pack     | \$7.819           | \$10.25                      | 2/21/2014            | Merck<br>(CSL product) | 200-2013-<br>54010 |

Figure EC.1 Archived CDC Price List for Adult Influenza Vaccine as of September 30, 2013 (screenshot).

## References

- Milgrom, P., I Segal. 2002. Envelope theorems for arbitrary choice sets. *Econometrica* **70**(2) 583–601.
- Rosenthal, J. S. 2000. *A First Look at Rigorous Probability Theory*. World Scientific, Singapore.
